# Mitochondria in vascular disease

Emma Yu<sup>†</sup>, John Mercer<sup>†</sup>, and Martin Bennett\*

Division of Cardiovascular Medicine, University of Cambridge, Box 110, Addenbrooke's Hospital, Cambridge CB2 0QQ, UK

Received 8 November 2011; revised 21 February 2012; accepted 1 March 2012; online publish-ahead-of-print 5 March 2012

## Abstract

Mitochondria are often regarded as the powerhouse of the cell by generating the ultimate energy transfer molecule, ATP, which is required for a multitude of cellular processes. However, the role of mitochondria goes beyond their capacity to create molecular fuel, to include the generation of reactive oxygen species, the regulation of calcium, and activation of cell death. Mitochondrial dysfunction is part of both normal and premature ageing, but can contribute to inflammation, cell senescence, and apoptosis. Cardiovascular disease, and in particular atherosclerosis, is characterized by DNA damage, inflammation, cell senescence, and apoptosis. Increasing evidence indicates that mitochondrial damage and dysfunction also occur in atherosclerosis and may contribute to the multiple pathological processes underlying the disease. This review summarizes the normal role of mitochondria, the causes and consequences of mitochondrial dysfunction, and the evidence for mitochondrial damage and dysfunction in vascular disease. Finally, we highlight areas of mitochondrial biology that may have therapeutic targets in vascular disease.

## Keywords

Atherosclerosis • Mitochondria • DNA damage • Reactive oxygen species

This article is part of the Spotlight Issue on: Smooth Muscle Cells and Vascular Diseases

## 1. Introduction

Cardiovascular disease remains the leading cause of death in the Western World with two-thirds of mortality attributable to atherosclerosis. Atherosclerosis predominantly affects the large and medium-sized arteries, usually presenting from the fifth decade and accounting for over 1 million premature European deaths every year.<sup>1</sup> The atherosclerotic plaque is a multicellular lesion comprising vascular smooth muscle cells (VSMCs), monocyte/macrophages, T lymphocytes, and other inflammatory cells, in addition to intra- and extracellular lipid and cellular debris. Elevated circulating lipids, such as low-density lipoproteins (LDL), are a significant risk factor associated with increased plaque burden.<sup>2</sup> The migration of LDL into the vessel wall with subsequent oxidation and subsequent endothelial dysfunction are key processes initiating atherogenesis. LDL oxidation may occur through the action of intracellular lipoxygenases or be the result of reactive oxygen species (ROS).<sup>3,4</sup> Plaques often develop at regions of low shear stress at sites linked to endothelial dysfunction. Loss of the endothelium is implicated in leucocyte recruitment, adhesion, and migration and plaque development. However, VSMCs and monocyte/macrophages become the dominant cell types as the lesion advances. While early vascular lesions may be characterized by intimal hyperplasia and VSMC proliferation, mature lesions are characterized by a paucity of cells, premature cellular senescence, and increased apoptosis. The plaque environment has increased

ROS levels and DNA damage, which may create elevated bioenergetic demands and also promote cell senescence and apoptosis. Together, inflammation, cell death, and senescence lead to the formation of vulnerable lesions. The rupture of vulnerable plaques exposes the prothrombotic core to the circulation. Platelets then aggregate to form thrombi that can lead to arterial occlusion,<sup>5,6</sup> manifesting as heart attacks, or emboli, manifesting as strokes.

## 2. Mitochondria

Mitochondria are double membrane organelles, contained within the cytoplasmic compartment of all eukaryotic cells. As well as the nucleus, mitochondria are a source of DNA within a cell. The mitochondrial 16 kb genome encodes 13 polypeptides of the respiratory chain while the remaining 79 polypeptides are nuclear-encoded. These polypeptides combine to create the respiratory complexes required for the transport of electrons through the respiratory chain and the generation of ATP.

Coordination between the nuclear and mitochondrial genomes requires a high degree of fidelity. As well as the respiratory chain polypeptides, over 1000 other nuclear-encoded proteins, such as those of the Krebs [tricarboxylic (TCA)] cycle and those required for the formation of protein channels, are required to shuttle into the mitochondria.<sup>7</sup> Protein translocation through mitochondrial membranes

<sup>†</sup> These authors contributed equally to this work.

\* Corresponding author. Tel: +44 1223 331504; fax: +44 1223 331505, Email: mrb@mole.bio.cam.ac.uk

Published on behalf of the European Society of Cardiology. All rights reserved. © The Author 2012. For permissions please email: journals.permissions@oup.com.

involves the unfolding and ratcheting of the polypeptides, mediated by motor and chaperone proteins such as hsp70. Once in the matrix the proteins refold to their correct conformation, although the exact mechanism remains unclear.<sup>8</sup>

### 3. Mitochondrial function and dysfunction

#### 3.1 Oxidative phosphorylation

Mitochondria mediate oxidative phosphorylation (OXPHOS) via the transfer of electrons through multimeric complexes to produce ATP (Figure 1). Complexes I, II, III, and IV form the electron transport chain (ETC) on the inner mitochondrial membrane. NADH and succinate produced in the Krebs cycle donate electrons ( $e^-$ ) to Complexes I (NADH dehydrogenase) and II (succinate dehydrogenase). These electrons are transferred to ubiquinone (Q) and then delivered to Complex III (ubiquinol: cytochrome c oxidoreductase). The electrons flow to Complex IV (cytochrome c oxidase) via cytochrome c (C) and finally to the terminal acceptor oxygen, producing water. As the electrons are transferred, protons ( $H^+$ ) are pumped to the intermembrane space to create a gradient and the mitochondrial membrane potential. ATP synthase (Complex V) couples proton flow down this gradient to the synthesis of ATP, which is then available to fuel cellular function.

#### 3.2 Reactive oxygen species

ROS are produced as a by-product of the respiratory chain, making the mitochondria the major source of cellular ROS.<sup>9</sup> The leakage of

electrons from the ETC, predominantly at Complexes I and III, leads to the partial reduction of oxygen.<sup>10</sup> Superoxide ( $O_2^{\bullet -}$ ) is produced, which matrix manganese superoxide dismutase (MnSOD) or CuZnSOD in the intermembrane space convert into hydrogen peroxide ( $H_2O_2$ ).  $H_2O_2$  can then be fully reduced to water by antioxidant enzymes, such as glutathione peroxidase (GPX) or catalase.<sup>11</sup> GPX uses reduced glutathione (GSH) to catalyse the reduction in  $H_2O_2$ , and the resulting oxidized glutathione (GSSG) is restored to GSH by glutathione reductase (GR) (Figure 1). While catalase can also eliminate  $H_2O_2$ , it is only present in mitochondria from the heart and liver. BH3 homology proteins such as Bcl-2 have been suggested to also mediate an antioxidant role. For example, Bcl-2 has been shown to increase the expression of SOD. However, others have shown that Bcl-2 is initially pro-oxidant and there is up-regulation of the antioxidant defences in response.<sup>12</sup>

The mitochondrial antioxidant systems are important, because if  $H_2O_2$  is not reduced to water, it can generate the dangerous hydroxyl radical. Superoxide can also combine with nitric oxide to produce highly reactive products such as peroxynitrite ( $OONO^-$ ).<sup>13</sup> ROS can have deleterious effects on cellular function, through the modification of DNA, proteins, and lipids as described below. However, ROS also have important physiological roles, probably the most recognized of which is in the defence against infectious pathogens. Through the respiratory burst, phagocytes are capable of generating high levels of superoxide and hydrogen peroxide, to help with the clearance of microbes.<sup>14</sup> Beyond immune defence, the role of ROS also extends to signal transduction and second-messenger generation. For example, the hydroxyl radical activates guanylate cyclase, leading to the production of cGMP.<sup>15</sup> This is important for regulating vascular

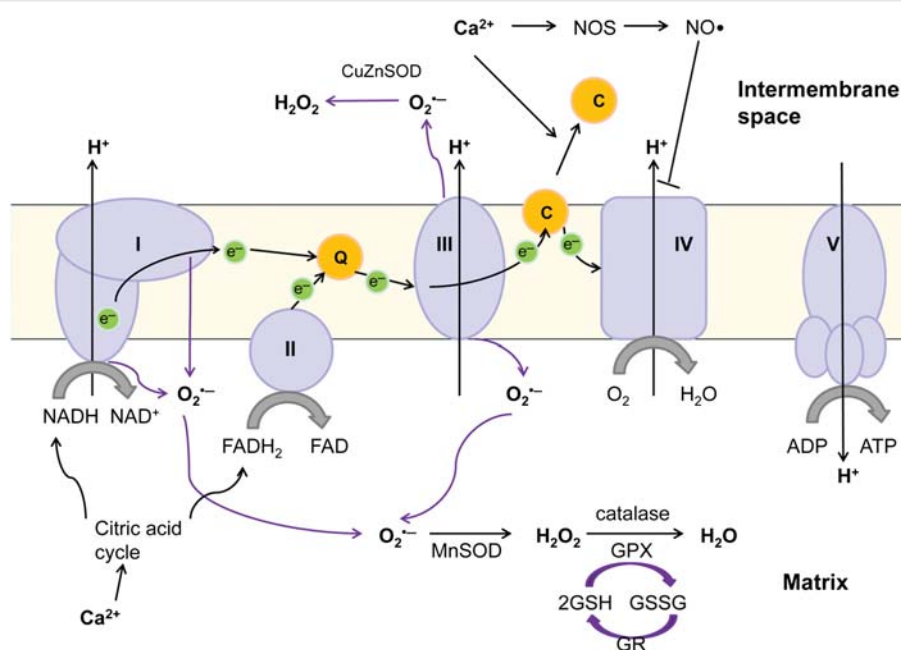

**Figure 1** OXPHOS, superoxide production, and antioxidant pathways in mitochondria. NADH and  $FADH_2$  supply high-energy electrons ( $e^-$ ) from metabolic substrates. Electrons pass through the ETC and reduce molecular oxygen to form water at Complex IV. Complex V uses the proton gradient achieved to convert ADP to ATP. Superoxide  $O_2^{\bullet -}$  is formed at Complexes I and III and is dismutated to  $H_2O_2$  by matrix MnSOD or CuZnSOD in the intermembrane space.  $H_2O_2$  can then be fully reduced to water by GPX or catalase. GPX uses reduced GSH to catalyse the reduction in  $H_2O_2$ , and the resulting GSSG is restored to GSH by GR.  $Ca^{2+}$  influences ROS production by promoting citric acid cycle activity, increasing the loss of cytochrome c and stimulating NOS. The  $NO^{\bullet}$  generated inhibits respiration at Complex IV, enhancing ROS production.

tone, with cGMP mediating vascular smooth muscle relaxation, and hence vasodilation.<sup>16</sup> ROS have also been implicated in mitogenic signalling. In particular, superoxide increases mitogen-activated protein kinase activity and stimulates VSMC proliferation.<sup>17,18</sup> However, frequent exposure to ROS can cause cell death,<sup>18</sup> such that regulation of their levels is crucial to cellular homeostasis.

The balance between ROS generation and the antioxidant activity of the cell controls cellular oxidative status. ROS production is influenced by a variety of factors including the mitochondrial metabolic state. For example, stimuli such as hyperglycaemia and leptin (which is involved in the regulation of body weight) can both induce superoxide production.<sup>19,20</sup> Increasing levels of oxygen and decreased electron flow through the ETC are also associated with enhanced ROS generation,<sup>9,21</sup> and calcium is an important regulator of ROS production (reviewed in Kowaltowski *et al.*<sup>22</sup>). While an increase in  $\text{Ca}^{2+}$  may lead to decreased ROS formation through a transient decrease in the mitochondrial membrane potential,<sup>23</sup> excess  $\text{Ca}^{2+}$  is associated with oxidative stress.<sup>24</sup> The potential mechanisms of how  $\text{Ca}^{2+}$  influences ROS production include promoting citric acid cycle activity and increasing the loss of cytochrome *c*.<sup>22</sup>  $\text{Ca}^{2+}$  can also stimulate nitric oxide synthase (NOS),<sup>25</sup> increasing nitric oxide  $\text{NO}^{\bullet}$  generation, which inhibits Complex IV.<sup>26</sup> Again ROS formation would be enhanced (Figure 1).

As oxidative stress occurs when there is an imbalance between ROS production and the antioxidant defences, it is important that ROS can have a regulatory effect on their own levels. For example, superoxide stimulates uncoupling protein (UCP-1), thereby decreasing the mitochondrial membrane potential and reducing ROS generation.<sup>27,28</sup>

### 3.3 Calcium

While 99.9% of calcium is deposited in bones, its flux within the body is tightly regulated, with serum calcium levels rarely changing by more than 1%. The role of calcium in the contraction of cardiac, skeletal, and smooth muscle is well established. However, intracellular calcium is also involved in signal transduction pathways by acting as a second messenger, and it is a co-factor for many enzymes.

Mitochondrial calcium uptake occurs via the  $\text{Ca}^{2+}$  uniporter<sup>29</sup> driven by both the concentration gradient and mitochondrial membrane potential. Importantly, through close apposition with the endoplasmic reticulum (ER) or plasma membrane (PM), mitochondria can be exposed to high-concentration  $\text{Ca}^{2+}$  microdomains,<sup>30,31</sup> which stimulate  $\text{Ca}^{2+}$  uptake, allowing mitochondria to sense and modulate cellular  $\text{Ca}^{2+}$  signalling. Calcium extrusion occurs via the sodium/calcium exchanger to maintain mitochondrial  $\text{Ca}^{2+}$  levels.<sup>32</sup> In addition, the mitochondrial permeability transition pore (MPTP) also allows calcium efflux. Furthermore, mitochondria can influence cellular  $\text{Ca}^{2+}$  through their generation of ATP, which is necessary for  $\text{Ca}^{2+}$  ATPase activity. These transporters are found on the PM and sarcoplasmic reticulum (SR) and help regulate cytosolic  $\text{Ca}^{2+}$  concentration.<sup>33,34</sup>

## 4. Mitochondria dysfunction in vascular disease

### 4.1 Evidence for mitochondrial dysfunction in atherosclerosis

There is increasing evidence that mitochondrial damage and dysfunction occurs in atherosclerosis in both human cells and in animal

models. For example, a large 5 kb section of deleted mtDNA is often observed and is termed 'the common mitochondrial deletion'. This occurs at sites of mis-repaired mtDNA damage<sup>35</sup> and is increased in leucocytes of patients with atherosclerosis.<sup>36</sup> ROS exposure increases levels of mtDNA oxidative lesions and reduces mitochondrial protein and ATP production in human VSMCs.<sup>37</sup>

Hyperlipidaemia is a risk factor for atherosclerosis and apolipoprotein E (ApoE) is a component of lipoprotein particles required for their uptake into tissues. Mice deficient for ApoE ( $\text{ApoE}^{-/-}$ ) develop hyperlipidaemia and subsequent accelerated atherosclerosis. It has been observed that mitochondrial DNA damage in  $\text{ApoE}^{-/-}$  mice precedes atherogenesis and the damage is exacerbated by impaired antioxidant activity.<sup>38</sup> Smoke exposure also promotes atherogenesis and aortic mtDNA damage, with an accompanying decrease in cardiac adenine nucleotide transporter (ANT) activity which is important for ATP synthesis.<sup>39</sup> More recently,  $\text{ApoE}^{-/-}$  mice haploinsufficient for the DNA repair enzyme ataxia telangiectasia mutated (ATM) demonstrated accelerated atherogenesis, increased nuclear and mtDNA damage, and impaired liver mitochondrial Complex I activity.<sup>38,40</sup> Respiratory chain dysfunction is therefore shown to be associated with atherosclerosis development, but as yet, its role as a causal factor in atherogenesis has not been proven.

Nuclear and mitochondrial DNA damage such as 8-oxo-G (an oxidized form of guanine) has been found in human lesions, and recent data suggest that accumulation of this damage precedes atherogenesis and correlates with the extent of disease.<sup>41</sup> Nuclear and mtDNA damage can combine, causing the assembly of faulty respiratory complexes, with resultant respiratory chain dysfunction.<sup>42</sup> While damage to Complex V only affects ATP synthesis, disruption to Complexes I, III, and IV can also decrease the mitochondrial membrane potential. Overall, the reduced energy supply affects cellular activity.<sup>43</sup>

### 4.2 Causes of mitochondria dysfunction

Mitochondrial dysfunction can be caused by DNA damage which is associated with many of the risk factors for atherosclerosis.<sup>44</sup> For example, smoking can both induce DNA damage and inhibit the rate of DNA repair.<sup>45</sup> Diabetes mellitus is characterized by Islet cell dysfunction and failed DNA repair,<sup>46,47</sup> which is exacerbated by ROS.<sup>48</sup> In addition, hyperlipidaemia is regarded as one of the key driving forces of atherosclerosis, with oxidation of lipoprotein particles associated with increases in DNA damage markers. Importantly, mitochondrial DNA is particularly susceptible to free radical damage. While nuclear DNA is ensconced within protective histones and chromatin, mitochondria lack this protection. Furthermore, mitochondrial DNA is closer to the generator of free radicals, the respiratory chain. Finally, mitochondria rely on more basic DNA repair processes, such as base excision repair (mt-BER), which removes smaller adducts incorporated by alkylation, deamination, or oxidation.<sup>49</sup> However, unlike the nucleus, mitochondria can increase their biogenesis<sup>50</sup> and remove poorly performing mitochondria via mitophagy and the ubiquitin–proteasome system (UPS).

Altered mitochondrial dynamics could be another cause of mitochondrial dysfunction. Mitochondria constantly undergo fission and fusion events, which control their morphology and integrity.<sup>51,52</sup> Fusion allows mixing of the mitochondrial genomes, diluting and so protecting against damaged DNA.<sup>53</sup> Fission is also required for normal mitochondrial function, with impairment leading to decreased respiration.<sup>54</sup> The accumulation of dysfunctional mitochondria may therefore result from changes in mitochondrial dynamics. Whether

this contributes to vascular disease development is an interesting concept, which is yet to be fully explored.

The health of mitochondria is in part regulated by their biogenesis, and PGC-1 $\alpha$  (peroxisome proliferator-activated receptor gamma coactivator alpha) is regarded as the master regulator of mitochondrial biogenesis and homeostasis.<sup>55</sup> PGC-1 $\alpha$  is a transcriptional coactivator of PPAR $\gamma$ , and together, they regulate genes involved in energy metabolism. Working through cAMP response element-binding proteins and nuclear respiratory factors, they provide a link between extracellular stimuli and regulation of mitochondrial biogenesis. PGC-1 $\alpha$  can be regulated through several different mechanisms. Cell stress can increase levels of ROS, which in turn can stimulate PGC-1 $\alpha$ .<sup>56</sup> The cell responds by increasing ATP availability, through the transcription of OXPHOS co-regulated genes.<sup>57</sup> The histone deacetylase SIRT1 is also known to bind and activate PGC-1 $\alpha$  through deacetylation,<sup>58</sup> and post-translational modifications such as sumoylation are also thought to modify its activity and its degradation through ubiquitin-mediated degradation.<sup>59</sup> Collectively failure of PGC1- $\alpha$  regulation can lead to impaired mitochondrial biogenesis and health and contribute to the disease phenotype.

### 4.3 Consequences of mitochondrial dysfunction

One theory of the contribution of DNA damage to atherosclerosis is that nuclear and mtDNA code for mutated polypeptides, which are incorporated into the respiratory chain and contribute to defective OXPHOS. Loss of integrity of the respiratory chain, especially at Complex I, is thought to increase ROS and feeds back to further increase DNA damage. The nuclear genome has evolved complex and

multiply redundant pathways to effect repair in response to DNA damage<sup>60</sup> (Figure 2). Thus, there is constitutive expression of sensor proteins, such as Mediator of DNA damage Checkpoint-1 (MDC1), which keep guard, waiting for a reactively modified DNA nucleotide or base pair.<sup>61</sup> Once faulty DNA is detected, MDC1 is bound and a number of proteins are recruited. Initially, MRE11/RAD-50/NBS-1 (MRN) or 9-1-1 complexes activate ATM kinase and ATM-related kinase by phosphorylation causing dimer dissociation. This can lead to phosphorylation of the checkpoint kinases (CHK1/2).<sup>27,62</sup> These in turn activate effector molecules such as p53, to result in DNA repair, cell cycle arrest, or initiation of apoptosis.<sup>63</sup>

Normal mitochondria can become dysfunctional through DNA damage and disrupted mitochondrial dynamics. Mitochondrial dysfunction manifests as impaired ATP production, increased ROS generation, and calcium dysregulation. These changes are likely to affect all the cell types involved in atherosclerosis, including endothelial cells (ECs), inflammatory leucocytes, and VSMCs. The negative changes in cell physiology promote apoptosis, cell cycle arrest, senescence, altered lipid processing, and inflammation, which are all key processes in the development of vulnerable atherosclerotic plaques.

#### 4.3.1 ROS formation

Inhibition of OXPHOS or Complex I deficiency promotes increased production of superoxide and hydrogen peroxide.<sup>64,65</sup> The resulting oxidative stress promotes DNA damage, and oxidative modification of mitochondrial lipids and proteins, altering cellular bioenergetics. For example, cardiolipin located in the inner mitochondrial membrane is needed for electron transfer in Complex I;<sup>66</sup> oxidative damage of cardiolipin reduces Complex I activity.<sup>67</sup> Furthermore, ROS can affect ATP generation by modifying and inhibiting ANT.<sup>68</sup> The

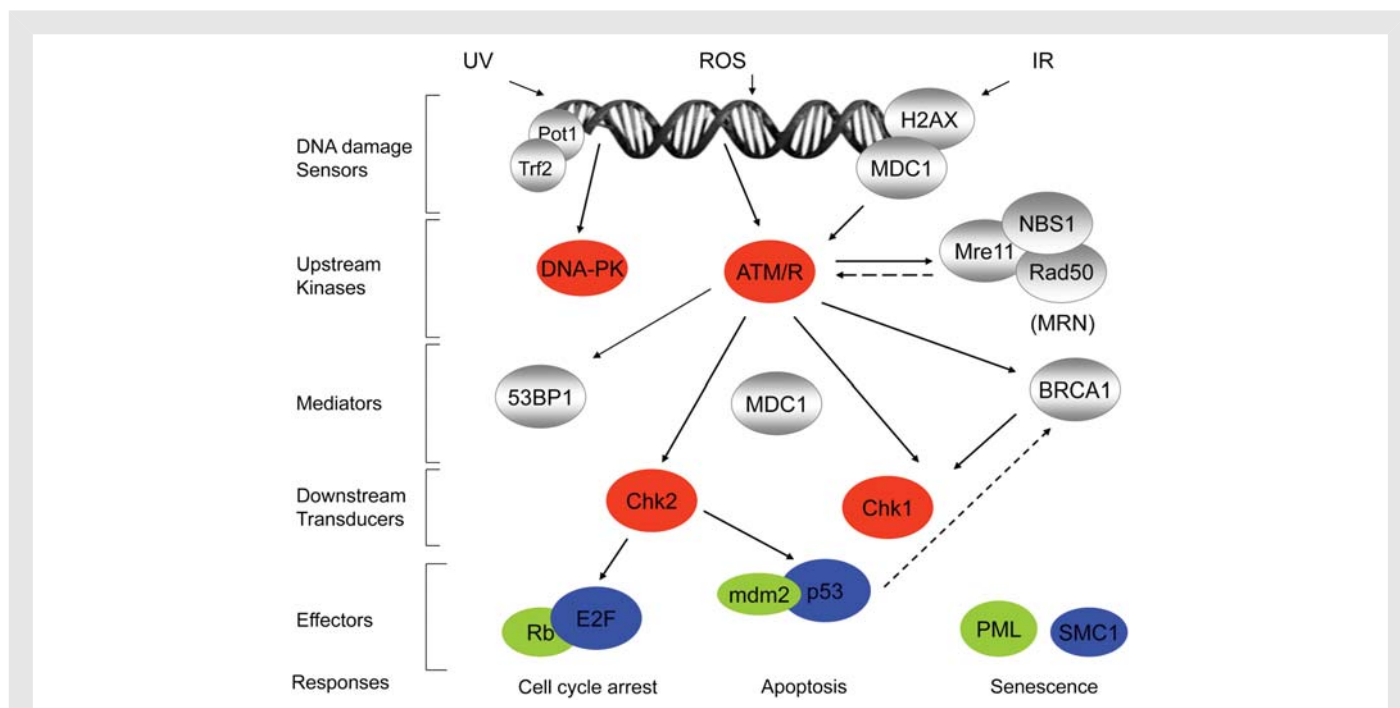

**Figure 2** DNA damage repair signalling pathway in response to single- and double-strand breaks. Constitutive expression of sensor proteins such as MDC-1 and H2AX help recruit the MRN complex. PIKK family proteins such as DNAPk and ATM are then activated, leading to phosphorylation of the checkpoint kinases CHK1 and CHK2.<sup>27,62</sup> These and other proteins in turn activate effector molecules such as p53, to result in DNA repair, cell cycle arrest, or initiation of apoptosis.<sup>63</sup> A full description of these pathways is provided in the text.



resulting decrease in ATP favours MPTP opening, and indeed, loss of SOD antioxidant capacity leads to early apoptosis in a murine model.<sup>69</sup>

### 4.3.2 Calcium dysregulation

Cytosolic calcium must be regulated with exquisite sensitivity to maintain cellular homeostasis. While the ER is the traditional cytoplasmic store,<sup>70</sup> recent evidence suggests that mitochondria may be the gatekeepers controlling calcium signalling.<sup>32</sup>

Reduced mitochondrial ATP generation can disrupt cellular  $\text{Ca}^{2+}$  homeostasis, through impaired PM and SR  $\text{Ca}^{2+}$  ATPase activity. At the level of the mitochondria, respiratory chain dysfunction leads to loss of the membrane potential, which is required for mitochondrial  $\text{Ca}^{2+}$  entry via the uniporter.<sup>71</sup> Resultant changes in  $\text{Ca}^{2+}$  concentration affect respiration, because several intramitochondrial enzymes (pyruvate, oxoglutarate, and sodium isocitrate dehydrogenase) are  $\text{Ca}^{2+}$ -sensitive.<sup>72</sup> A decrease in their activity leads to reduced substrate provision for OXPHOS, further favouring apoptosis or cellular senescence.

### 4.3.3 Apoptosis and cellular senescence

Although pro- and anti-apoptotic signalling pathways are complex, broadly apoptosis can occur via two pathways—the receptor-mediated extrinsic pathway or the mitochondrial-dependent intrinsic pathway.

The intrinsic apoptotic pathway is dependent on the MPTP, first proposed by Haworth and Hunter in 1979.<sup>73</sup> While its exact

structure still remains uncertain, it has been suggested that the outer membrane voltage-dependent anion channel combines with inner membrane pores, such as the phosphate carrier Pic or ANT<sup>74,75</sup> (Figure 3). Although this is debated, nearly all groups confirm the presence of cyclophilin D as an essential component. When the MPTP opens in response to apoptotic stimuli, equilibration of  $\text{Na}^+$ ,  $\text{K}^+$ , and  $\text{Ca}^{2+}$  ions between the mitochondrial matrix and cytosol can occur, leading to mitochondrial swelling.<sup>76</sup> There is a subsequent release of factors promoting cell death, including cytochrome c, apoptosis-inducing factor, and second mitochondrial activator of caspases (Smac).<sup>77–79</sup> Cytochrome c triggers the binding of Apaf-1 with procaspase 9, and the subsequent caspase 3 activation initiates the downstream apoptotic pathway.<sup>80</sup> Furthermore, the process is self-amplifying, with the loss of cytochrome c impairing OXPHOS and the antioxidant capacity of the mitochondria. Regulation of MPTP is controlled by calcium flux, ROS, and ATP.<sup>81</sup> As decreased levels of ATP favour pore opening,<sup>76</sup> mitochondrial respiratory chain dysfunction can result in increased apoptosis. Interestingly, recent work has shown that rupture of the outer mitochondrial membrane will not automatically lead to cell death if inner mitochondrial membrane integrity can be maintained. This provides a window of opportunity to rescue and repair damaged mitochondria, maintaining their viability and avoiding the onset of mitochondrial death.<sup>82</sup>

Impaired respiratory chain function can also lead to senescence. Cellular senescence describes the phenomenon where cells have a limited number of replicative divisions before they enter irreversible cell cycle arrest.<sup>83</sup> Alterations in metabolism occur with cellular

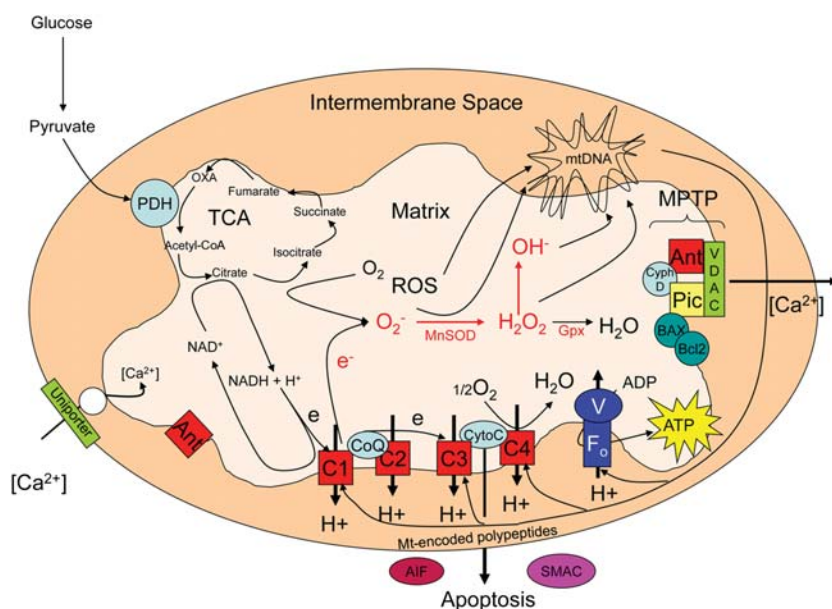

**Figure 3** Interconnections between energy generation via OXPHOS through respiratory Complexes C1–C5, ROS production and apoptosis. The TCA cycle regenerates NADH as an electron donor to Complexes C1 and C2. Protons are concomitantly pumped across the intermembrane space and later returned via Complex V to generate ATP from ADP. The mitochondrial genome encodes polypeptides (seven for C1, one for C3) that combine with nuclear variants to create the multimeric complexes. Electrons can become unpaired and leak from passage through the respiratory complexes forming electron-free radicals. In close proximity to molecular oxygen, these form superoxide that can transmute to hydrogen peroxide and hydroxyl radicals. These ROS damage membranes and mtDNA, resulting in faulty complexes that leak more electrons to produce more ROS. Loss of cell homeostasis results in MPTP opening and dysregulation of calcium homeostasis. Inappropriate activation of calcium-dependent enzymes and protein kinase results in MPTP opening, loss of osmotic control, and release of cytochrome c to the cytosol and apoptosis (modified from Puddu *et al.*<sup>44</sup>).

senescence, including a significant reduction in ATP levels.<sup>84</sup> A decrease in ATP, and subsequent increase in AMP:ATP, can be sensed by AMP-activated protein kinase (AMPK).<sup>85</sup> AMPK activation inhibits biosynthetic pathways, helping energy conservation, while the decreased expression of proliferative genes, including cyclins A and B, leads to senescence.<sup>86,87</sup> Consistent with this, murine cells with mitochondrial defects have reduced proliferation.<sup>88</sup>

## 5. Consequences of mitochondrial dysfunction in atherosclerosis

Although direct evidence of causality is lacking, multiple potential consequences of mitochondrial dysfunction occur in atherosclerosis, including inflammation from ROS generation, apoptosis, and senescence, raising the prospect that mitochondrial damage/dysfunction directly promotes these features.

Apoptotic VSMCs, ECs, and macrophages are present in atherosclerotic lesions<sup>89</sup> and affect plaque development and morphology. VSMC apoptosis leads to accelerated plaque growth, with increased calcification and medial degeneration.<sup>90</sup> Furthermore, VSMC apoptosis can result in thinning of the fibrous cap, an increase in the necrotic core, and intimal inflammation.<sup>5</sup> Similarly, macrophages comprise 40–50% of the identified apoptotic cells present,<sup>89</sup> and macrophage apoptosis leads to an expansion of the necrotic core.<sup>6</sup> EC apoptosis is also significant as it would compromise the integrity and function of the vascular endothelial layer. Damage to the endothelium is considered to be an initiating step in atherosclerosis,<sup>91</sup> with LDL uptake and leucocyte adhesion and migration occurring at sites of endothelial dysfunction. EC apoptosis may also be mediated through mitochondrial dysfunction and MPTP activation, and indeed, oxidized LDL induces the mitochondrial apoptotic cascade in vascular ECs.<sup>92</sup> While endothelial mitochondrial dysfunction may not necessarily result in apoptosis, the altered  $\text{Ca}^{2+}$  handling could also affect ROS and nitric oxide generation, promoting atherosclerosis.<sup>93</sup>

Cell senescence has also been demonstrated in atherosclerosis. For example, VSMCs derived from human plaques show a senescent phenotype in culture<sup>94,95</sup> and express markers of senescence, including senescence-associated  $\beta$ -galactosidase and p21.<sup>96</sup> Senescent VSMCs have a decreased response to  $\beta$ -adrenergic receptor stimulation, which could increase vascular tone and blood pressure.<sup>97</sup> Furthermore, elastase production is increased by both senescent cells and in atherosclerosis,<sup>98</sup> promoting the breakdown of extracellular matrix and a decrease in vascular compliance. Importantly, the senescence of VSMCs could potentially contribute to inefficient plaque repair, with resulting plaque instability.<sup>99</sup>

While there is increasing evidence of mitochondrial dysfunction in atherosclerosis, it is not clear whether this is a consequence of the disease or that both atherosclerosis and mitochondrial dysfunction share common causes. For example, mitochondria evolve from normal to dysfunctional throughout their lifespan. The risk factors for atherosclerosis may accelerate this process, by directly affecting mitochondrial DNA and proteins, but by also changing their biogenesis and degradation. Similarly, it is unclear whether these effects are mediated entirely through ROS generation, or other effects from mitochondrial damage/dysfunction. These questions will not be answered until we can selectively promote or inhibit mitochondrial damage/dysfunction separate from ROS production and

investigate the lifecycle of mitochondria during the development of atherosclerosis.

## 6. Mitochondrial dysfunction in other vascular diseases

Mitochondrial damage and dysfunction may also have a role in other vascular diseases, such as hypertension, stroke, heart failure, and cardiac ischaemia/reperfusion injury.<sup>100,101</sup> Global levels of hypertension are estimated at over 1 billion people worldwide,<sup>102</sup> and if untreated, the condition predisposes to increased cardiovascular-related mortality. However, hypertension has a complex aetiology with over 50 genes postulated to be involved,<sup>103</sup> some of which are also involved with mitochondrial homeostasis. For example, the angiotensin receptor AT-1 is a frequent target of drug intervention, and both drugs such as Losartan (AT-II antagonist) and the receptor itself may regulate free radical generation at the level of the mitochondria.<sup>104</sup> The AT-1 receptor has recently been shown to be sequestered to mitochondria and may influence signalling.<sup>105</sup> Mitochondrial dysfunction has also been seen in the microvasculature of stroke patients, which can be reduced by Losartan and mitochondrial-specific antioxidants such as Mito-TEMPO.<sup>106</sup> This suggests that not only is mitochondrial dysfunction leading to increased generation of ROS, which promotes these pathologies, but that targeted therapies may mediate protection.

As in the vasculature, an intact endothelium (endocardium) is required for normal cardiac physiology, as it is vital for substrate supply, provides mediators such as nitric oxide, and trophic support for cardiac myocytes.<sup>93</sup> Disruption to endothelial function has been documented in heart failure<sup>107,108</sup> and mitochondrial dysfunction may have a contributory role. For example,  $\text{TNF}\alpha$  is increased in advanced heart failure<sup>109</sup> and can increase mitochondrial ROS formation in ECs.<sup>110</sup> The ROS produced can compromise endothelial function through oxidative damage, and through interacting with, and so decreasing the bioavailability of nitric oxide.<sup>111</sup>

Mitochondrial ROS production may also contribute to the endothelial dysfunction observed in ischaemia–reperfusion injury following restoration of coronary blood flow.<sup>112</sup> Ischaemia–reperfusion results in damage to the endothelium, with apoptosis of capillary ECs and decreased endothelium-dependent relaxation of coronary arteries.<sup>113,114</sup> Increased respiratory chain ROS generation may contribute to this endothelial dysfunction, as hypoxia–reoxygenation increases respiratory chain ROS production, which can then trigger interleukin-6 secretion and increased EC permeability.<sup>115</sup>

## 7. Mitochondria as targets for treatment in vascular disease

From the above discussion, it is apparent that prevention or reversal of mitochondrial damage/dysfunction may represent a target in vascular disease. Indeed, it is highly likely that the current therapeutics reduce mitochondrial damage/dysfunction as part of their mode of action. For example, the HMG-CoA reductase inhibitors (Statins), proven as a successful treatment of atherosclerosis,<sup>116</sup> capable of inducing lesion regression,<sup>117</sup> also reduce oxidative DNA damage, in part by accelerating DNA repair.<sup>118</sup> Statins also improve mitochondria biogenesis via PGC1- $\alpha$  and reduced ROS.<sup>119</sup>

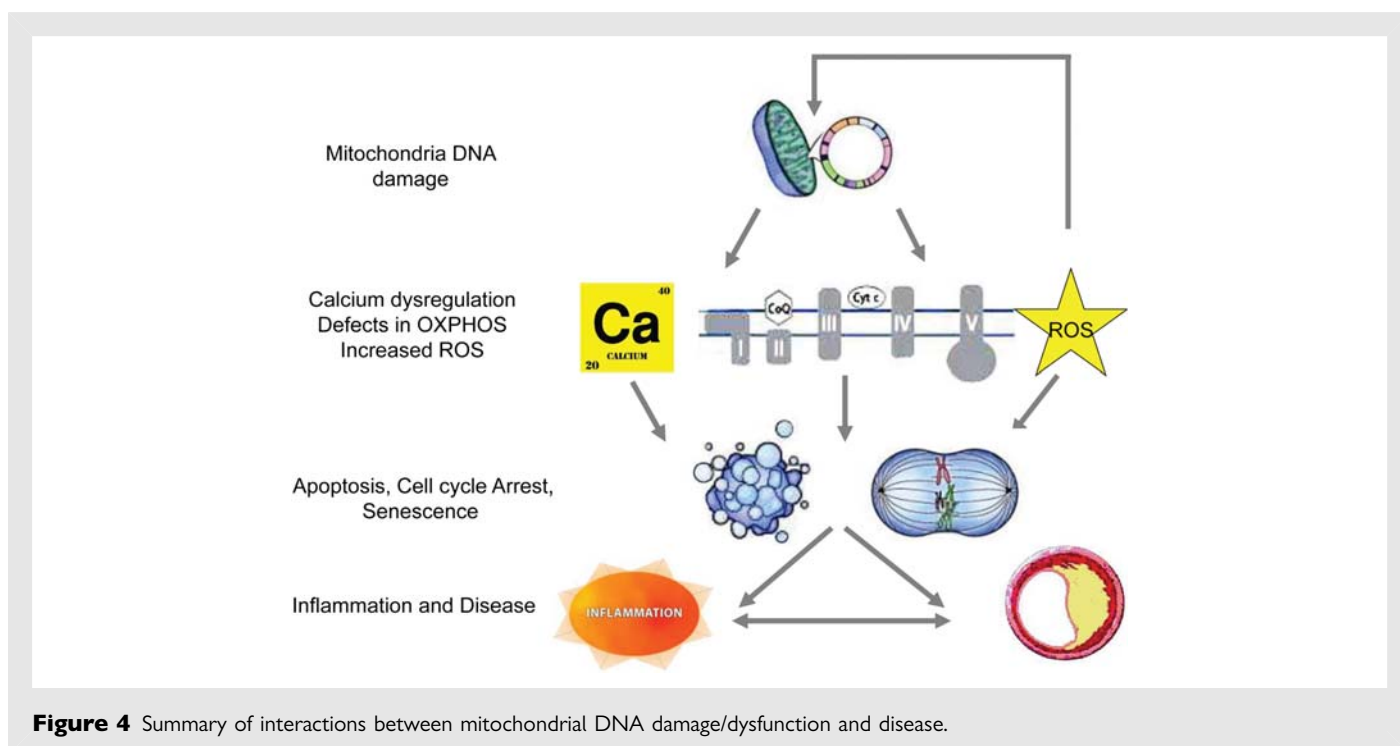

**Figure 4** Summary of interactions between mitochondrial DNA damage/dysfunction and disease.

In contrast, it is more difficult to establish a role for specific treatments whose primary target is the mitochondria. However, given that ROS have a critical role in atherosclerosis development, recent advances in targeting antioxidants may be an effective strategy. An example would be an agent such as MitoQ, a targeted ubiquinone moiety that accumulates in mitochondria and decreases oxidative damage.<sup>120</sup> Although MitoQ improves cardiac hypertrophy<sup>121</sup> and ischaemic–reperfusion injury,<sup>122</sup> its potential role in human atherosclerosis remains undetermined.<sup>123</sup>

An alternative therapeutic approach is via intervention in the recycling of damaged mitochondria. Normal mammalian mitochondria are targeted for recycling by the UPS. Proteins such as Parkin are recognized by E3-ubiquitin ligase and are expressed on the outer mitochondrial membrane. These proteins tag the organelle for mitochondria-associated degradation or mitochondrial autophagy, now termed mitophagy.<sup>124</sup> It has been suggested that proteasomal ageing limits mitochondrial capacity to recycle and may provide a fruitful area of intervention.<sup>125,126</sup>

In addition to drug therapy, lifestyle interventions may also be beneficial in reducing the effects of mitochondrial damage/dysfunction, as suggested by knockout mouse models. For example, mice lacking DNA proofreading activity have mitochondrial dysfunction, an accelerated ageing phenotype, and multiorgan pathologies.<sup>127</sup> Recent work suggests that endurance exercise can confer a partial rescue of the pathology with reduced apoptosis in multiple tissues.<sup>128</sup> Increased mitochondrial biogenesis, decreased mtDNA damage, and improved respiratory chain capacity were demonstrated.<sup>129</sup> Similarly, calorie restriction has been shown to reduce mitochondria respiratory chain activity and ROS generation.<sup>130</sup> The reduced ROS production may be the result of decreased substrate availability or be due to Akt activation. Akt is a pro-survival kinase, mediating activation of eNOS.<sup>131</sup> eNOS is known to increase mitochondrial biogenesis, which is predicted to reduce ROS production.

SIRT3, a mitochondria histone deacetylase, regulates fatty acid catabolism and ketogenesis during fasting, which is also implicated in the control of ROS generation.<sup>132</sup>

## 8. Conclusions

There is increasing evidence that mitochondrial damage/dysfunction occurs both in normal ageing and in atherosclerosis. Mitochondrial dysfunction can result in impaired OXPHOS, increased ROS generation, and calcium dysregulation. These effects promote apoptosis and senescence, which are key processes in the development of vulnerable atherosclerotic plaques (Figure 4). Mitochondrial dysfunction also has key metabolic effects, whose systemic manifestations may also promote atherosclerosis. Mitochondrial damage/dysfunction is thus a target for therapeutic intervention by targeted medicines or lifestyle changes.

**Conflict of interest:** none declared.

## Funding

This work was supported by the British Heart Foundation grants RG/08/009/25841 and FS/10/70/28507 and the Cambridge NIHR Biomedical Research Centre.

## References

- Levi F, Chatenoud L, Bertuccio P, Lucchini F, Negri E, La Vecchia C. Mortality from cardiovascular and cerebrovascular diseases in Europe and other areas of the world: an update. *Eur J Cardiovasc Prev Rehabil* 2009;**16**:333–350.
- Libby P, Ridker PM, Hansson GK. Progress and challenges in translating the biology of atherosclerosis. *Nature* 2011;**473**:317–325.
- Morel DW, DiCorleto PE, Chisolm GM. Endothelial and smooth muscle cells alter low density lipoprotein in vitro by free radical oxidation. *Arteriosclerosis* 1984;**4**:357–364.
- Parthasarathy S, Wieland E, Steinberg D. A role for endothelial cell lipoxygenase in the oxidative modification of low density lipoprotein. *Proc Natl Acad Sci USA* 1989;**86**:1046–1050.

5. Clarke MC, Figg N, Maguire JJ, Davenport AP, Goddard M, Littlewood TD et al. Apoptosis of vascular smooth muscle cells induces features of plaque vulnerability in atherosclerosis. *Nat Med* 2006;**12**:1075–1080.
6. Thorp E, Li Y, Bao L, Yao PM, Kuriakose G, Rong J et al. Brief report: increased apoptosis in advanced atherosclerotic lesions of Apoe<sup>-/-</sup> mice lacking macrophage Bcl-2. *Arterioscler Thromb Vasc Biol* 2009;**29**:169–172.
7. Catalano D, Licciulli F, Turi A, Grillo G, Saccone C, D'Elia D. MitoRes: a resource of nuclear-encoded mitochondrial genes and their products in Metazoa. *BMC Bioinformatics* 2006;**7**:36.
8. Yamano K, Kuroyanagi-Hasegawa M, Esaki M, Yokota M, Endo T. Step-size analyses of the mitochondrial Hsp70 import motor reveal the Brownian ratchet in operation. *J Biol Chem* 2008;**283**:27325–27332.
9. Turrens JF. Mitochondrial formation of reactive oxygen species. *J Physiol* 2003;**552**:335–344.
10. Turrens JF, Boveris A. Generation of superoxide anion by the NADH dehydrogenase of bovine heart mitochondria. *Biochem J* 1980;**191**:421–427.
11. Chance B, Sies H, Boveris A. Hydroperoxide metabolism in mammalian organs. *Physiol Rev* 1979;**59**:527–605.
12. Chen ZX, Pervaiz S. BCL-2: pro-or anti-oxidant? *Front Biosci (Elite Ed)* 2009;**1**:263–268.
13. Beckman JS, Koppenol WH. Nitric oxide, superoxide, and peroxynitrite: the good, the bad, and ugly. *Am J Physiol* 1996;**271**:C1424–C1437.
14. Keisari Y, Braun L, Flescher E. The oxidative burst and related phenomena in mouse macrophages elicited by different sterile inflammatory stimuli. *Immunobiology* 1983;**165**:78–89.
15. Mittal CK, Murad F. Activation of guanylate cyclase by superoxide dismutase and hydroxyl radical: a physiological regulator of guanosine 3',5'-monophosphate formation. *Proc Natl Acad Sci USA* 1977;**74**:4360–4364.
16. Ignarro LJ, Kadowitz PJ. The pharmacological and physiological role of cyclic GMP in vascular smooth muscle relaxation. *Annu Rev Pharmacol Toxicol* 1985;**25**:171–191.
17. Baas AS, Berk BC. Differential activation of mitogen-activated protein kinases by H<sub>2</sub>O<sub>2</sub> and O<sub>2</sub><sup>-</sup> in vascular smooth muscle cells. *Circ Res* 1995;**77**:29–36.
18. Li PF, Dietz R, von Harsdorf R. Differential effect of hydrogen peroxide and superoxide anion on apoptosis and proliferation of vascular smooth muscle cells. *Circulation* 1997;**96**:3602–3609.
19. Du XL, Edelstein D, Rossetti L, Fantus IG, Goldberg H, Ziyadeh F et al. Hyperglycemia-induced mitochondrial superoxide overproduction activates the hexosamine pathway and induces plasminogen activator inhibitor-1 expression by increasing Sp1 glycosylation. *Proc Natl Acad Sci USA* 2000;**97**:12222–12226.
20. Yamagishi SI, Edelstein D, Du XL, Kaneda Y, Guzman M, Brownlee M. Leptin induces mitochondrial superoxide production and monocyte chemoattractant protein-1 expression in aortic endothelial cells by increasing fatty acid oxidation via protein kinase A. *J Biol Chem* 2001;**276**:25096–25100.
21. Turrens JF, Freeman BA, Levitt JG, Crapo JD. The effect of hyperoxia on superoxide production by lung submitochondrial particles. *Arch Biochem Biophys* 1982;**217**:401–410.
22. Kowaltowski AJ, de Souza-Pinto NC, Castilho RF, Vercesi AE. Mitochondria and reactive oxygen species. *Free Radic Biol Med* 2009;**47**:333–343.
23. Komary Z, Tretter L, Adam-Vizi V. H<sub>2</sub>O<sub>2</sub> generation is decreased by calcium in isolated brain mitochondria. *Biochim Biophys Acta* 2008;**1777**:800–807.
24. Brookes PS, Yoon Y, Robotham JL, Anders MW, Sheu SS. Calcium, ATP, and ROS: a mitochondrial love-hate triangle. *Am J Physiol Cell Physiol* 2004;**287**:C817–C833.
25. Alderton WK, Cooper CE, Knowles RG. Nitric oxide synthases: structure, function and inhibition. *Biochem J* 2001;**357**:593–615.
26. Cleeter MW, Cooper JM, Darley-Usmar VM, Moncada S, Schapira AH. Reversible inhibition of cytochrome c oxidase, the terminal enzyme of the mitochondrial respiratory chain, by nitric oxide. Implications for neurodegenerative diseases. *FEBS Lett* 1994;**345**:50–54.
27. Lee JH, Paull TT. ATM activation by DNA double-strand breaks through the Mre11-Rad50-Nbs1 complex. *Science* 2005;**308**:551–554.
28. Echtay KS, Roussel D, St-Pierre J, Jakobs MB, Cadenas S, Stuart JA et al. Superoxide activates mitochondrial uncoupling proteins. *Nature* 2002;**415**:96–99.
29. De Stefani D, Raffaello A, Teardo E, Szabo I, Rizzuto R. A forty-kilodalton protein of the inner membrane is the mitochondrial calcium uniporter. *Nature* 2011;**476**:336–340.
30. Lawrie AM, Rizzuto R, Pozzan T, Simpson AW. A role for calcium influx in the regulation of mitochondrial calcium in endothelial cells. *J Biol Chem* 1996;**271**:10753–10759.
31. Rizzuto R, Pinton P, Carrington W, Fay FS, Fogarty KE, Lifshitz LM et al. Close contacts with the endoplasmic reticulum as determinants of mitochondrial Ca<sup>2+</sup> responses. *Science* 1998;**280**:1763–1766.
32. Szabadkai G, Duchon MR. Mitochondria: the hub of cellular Ca<sup>2+</sup> signaling. *Physiology (Bethesda)* 2008;**23**:84–94.
33. Carafoli E. Calcium pump of the plasma membrane. *Physiol Rev* 1991;**71**:129–153.
34. MacLennan DH, Rice WJ, Green NM. The mechanism of Ca<sup>2+</sup> transport by sarco(endo)plasmic reticulum Ca<sup>2+</sup>-ATPases. *J Biol Chem* 1997;**272**:28815–28818.
35. Krishnan K, Reeve A, Samuels D, Chinnery P, Blackwood J, Taylor R et al. What causes mitochondrial DNA deletions in human cells? *Nature Genetics* 2008;**40**:275–279.
36. Botto N, Berti S, Manfredi S, Al-Jabri A, Federici C, Clerico A et al. Detection of mtDNA with 4977 bp deletion in blood cells and atherosclerotic lesions of patients with coronary artery disease. *Mutat Res* 2005;**570**:81–88.
37. Ballinger SW, Patterson C, Yan CN, Doan R, Burow DL, Young CG et al. Hydrogen peroxide- and peroxynitrite-induced mitochondrial DNA damage and dysfunction in vascular endothelial and smooth muscle cells. *Circ Res* 2000;**86**:960–966.
38. Ballinger SW, Patterson C, Knight-Lozano CA, Burow DL, Conklin CA, Hu Z et al. Mitochondrial integrity and function in atherogenesis. *Circulation* 2002;**106**:544–549.
39. Knight-Lozano CA, Young CG, Burow DL, Hu ZY, Uyeminami D, Pinkerton KE et al. Cigarette smoke exposure and hypercholesterolemia increase mitochondrial damage in cardiovascular tissues. *Circulation* 2002;**105**:849–854.
40. Mercer JR, Cheng KK, Figg N, Gorenne I, Mahmoudi M, Griffin J et al. DNA damage links mitochondrial dysfunction to atherosclerosis and the metabolic syndrome. *Circ Res* 2010;**107**:1021–1031.
41. Harrison CM, Pompilius M, Pinkerton KE, Ballinger SW. Mitochondrial oxidative stress significantly influences atherogenic risk and cytokine-induced oxidant production. *Environ Health Perspect* 2010;**119**:676–681.
42. Nakase H, Moraes CT, Rizzuto R, Lombes A, DiMauro S, Schon EA. Transcription and translation of deleted mitochondrial genomes in Kearns–Sayre syndrome: implications for pathogenesis. *Am J Hum Genet* 1990;**46**:418–427.
43. Wallace DC. Mitochondrial diseases in man and mouse. *Science* 1999;**283**:1482–1488.
44. Puddu P, Puddu GM, Cravero E, De Pascalis S, Muscari A. The emerging role of cardiovascular risk factor-induced mitochondrial dysfunction in atherogenesis. *J Biomed Sci* 2009;**16**:112.
45. Armani C, Landini L Jr, Leone A. Molecular and biochemical changes of the cardiovascular system due to smoking exposure. *Curr Pharm Des* 2009;**15**:1038–1053.
46. Wang PW, Lin TK, Weng SW, Liou CW. Mitochondrial DNA variants in the pathogenesis of type 2 diabetes—relevance of Asian population studies. *Rev Diabet Stud* 2009;**6**:237–246.
47. Amaral S, Oliveira PJ, Ramalho-Santos J. Diabetes and the impairment of reproductive function: possible role of mitochondria and reactive oxygen species. *Curr Diabetes Rev* 2008;**4**:46–54.
48. Medina-Gomez G, Vidal-Puig A. Gateway to the metabolic syndrome. *Nat Med* 2005;**11**:602–603.
49. Gredilla R. DNA damage and base excision repair in mitochondria and their role in aging. *J Aging Res* 2010;**2011**:257093.
50. Chan NC, Chan DC. Parkin uses the UPS to ship off dysfunctional mitochondria. *Autophagy* 2011;**7**:771–772.
51. Chen H, Detmer SA, Ewald AJ, Griffin EE, Fraser SE, Chan DC. Mitofusins Mfn1 and Mfn2 coordinately regulate mitochondrial fusion and are essential for embryonic development. *J Cell Biol* 2003;**160**:189–200.
52. Bleazard W, McCaffery JM, King EJ, Bale S, Mozdy A, Tieu Q et al. The dynamin-related GTPase Dnm1 regulates mitochondrial fission in yeast. *Nat Cell Biol* 1999;**1**:298–304.
53. Ono T, Isobe K, Nakada K, Hayashi JI. Human cells are protected from mitochondrial dysfunction by complementation of DNA products in fused mitochondria. *Nat Genet* 2001;**28**:272–275.
54. Parone PA, Da Cruz S, Tondera D, Mattenberger Y, James DI, Maechler P et al. Preventing mitochondrial fission impairs mitochondrial function and leads to loss of mitochondrial DNA. *PLoS One* 2008;**3**:e3257.
55. Liu C, Lin JD. PGC-1 coactivators in the control of energy metabolism. *Acta Biochim Biophys Sin (Shanghai)* 2011;**43**:248–257.
56. Spiegelman BM. Transcriptional control of energy homeostasis through the PGC1 coactivators. *Novartis Found Symp* 2007;**286**:3–6; discussion 6–12, 162–163, 196–203.
57. Jones AW, Yao Z, Vicencio JM, Karkucinska-Wieckowska A, Szabadkai G. PGC-1 family coactivators and cell fate: roles in cancer, neurodegeneration, cardiovascular disease and retrograde mitochondria-nucleus signalling. *Mitochondrion* 2011;**12**:86–99.
58. Wareski P, Vaarmann A, Choubey V, Safiulina D, Liiv J, Kuim M et al. PGC-1α and PGC-1β regulate mitochondrial density in neurons. *J Biol Chem* 2009;**284**:21379–21385.
59. Wadosky KM, Willis MS. The story so far: post-translational regulation of peroxisome proliferator-activated receptors (PPARs) by ubiquitination and SUMOylation. *Am J Physiol Heart Circ Physiol* 2011;**302**:H515–H526.
60. Giunta S, Jackson SP. Give me a break, but not in mitosis: the mitotic DNA damage response marks DNA double-strand breaks with early signaling events. *Cell Cycle* 2011;**10**:1215–1221.
61. van Attikum H, Gasser SM. Crosstalk between histone modifications during the DNA damage response. *Trends Cell Biol* 2009;**19**:207–217.
62. Falck J, Coates J, Jackson SP. Conserved modes of recruitment of ATM, ATR and DNA-PKcs to sites of DNA damage. *Nature* 2005;**434**:605–611.



63. Shieh SY, Ahn J, Tamai K, Taya Y, Prives C. The human homologs of checkpoint kinases Chk1 and Cds1 (Chk2) phosphorylate p53 at multiple DNA damage-inducible sites. *Genes Dev* 2000;**14**:289–300.
64. Pitkanen S, Robinson BH. Mitochondrial complex I deficiency leads to increased production of superoxide radicals and induction of superoxide dismutase. *J Clin Invest* 1996;**98**:345–351.
65. Esposito LA, Melov S, Panov A, Cottrell BA, Wallace DC. Mitochondrial disease in mouse results in increased oxidative stress. *Proc Natl Acad Sci USA* 1999;**96**:4820–4825.
66. Fry M, Green DE. Cardiolipin requirement for electron transfer in complex I and III of the mitochondrial respiratory chain. *J Biol Chem* 1981;**256**:1874–1880.
67. Paradies G, Petrosillo G, Pistolesse M, Di Venosa N, Federici A, Ruggiero FM. Decrease in mitochondrial complex I activity in ischemic/reperfused rat heart: involvement of reactive oxygen species and cardiolipin. *Circ Res* 2004;**94**:53–59.
68. Yan LJ, Sohal RS. Mitochondrial adenine nucleotide translocase is modified oxidatively during aging. *Proc Natl Acad Sci USA* 1998;**95**:12896–12901.
69. Kokoszka JE, Coskun P, Esposito LA, Wallace DC. Increased mitochondrial oxidative stress in the Sod2 (+/–) mouse results in the age-related decline of mitochondrial function culminating in increased apoptosis. *Proc Natl Acad Sci USA* 2001;**98**:2278–2283.
70. Minamino T, Komuro I, Kitakaze M. Endoplasmic reticulum stress as a therapeutic target in cardiovascular disease. *Circ Res* 2010;**107**:1071–1082.
71. Saotome M, Katoh H, Satoh H, Nagasaka S, Yoshihara S, Terada H et al. Mitochondrial membrane potential modulates regulation of mitochondrial  $\text{Ca}^{2+}$  in rat ventricular myocytes. *Am J Physiol Heart Circ Physiol* 2005;**288**:H1820–H1828.
72. McCormack JG, Halestrap AP, Denton RM. Role of calcium ions in regulation of mammalian intramitochondrial metabolism. *Physiol Rev* 1990;**70**:391–425.
73. Haworth RA, Hunter DR. The  $\text{Ca}^{2+}$ -induced membrane transition in mitochondria. II. Nature of the  $\text{Ca}^{2+}$  trigger site. *Arch Biochem Biophys* 1979;**195**:460–467.
74. Halestrap AP. What is the mitochondrial permeability transition pore? *J Mol Cell Cardiol* 2009;**46**:821–831.
75. Varanyuwatana P, Halestrap AP. The roles of phosphate and the phosphate carrier in the mitochondrial permeability transition pore. *Mitochondrion* 2011;**12**:120–125.
76. Zoratti M, Szabo I. The mitochondrial permeability transition. *Biochim Biophys Acta* 1995;**1241**:139–176.
77. Liu X, Kim CN, Yang J, Jemmerson R, Wang X. Induction of apoptotic program in cell-free extracts: requirement for dATP and cytochrome c. *Cell* 1996;**86**:147–157.
78. Susin SA, Lorenzo HK, Zamzani M, Marzo I, Snow BE, Brothers GM et al. Molecular characterization of mitochondrial apoptosis-inducing factor. *Nature* 1999;**397**:441–446.
79. Du C, Fang M, Li Y, Li L, Wang X. Smac, a mitochondrial protein that promotes cytochrome c-dependent caspase activation by eliminating IAP inhibition. *Cell* 2000;**102**:33–42.
80. Li P, Nijhawan D, Budihardjo I, Srinivasula SM, Ahmad M, Alnemri ES et al. Cytochrome c and dATP-dependent formation of Apaf-1/caspase-9 complex initiates an apoptotic protease cascade. *Cell* 1997;**91**:479–489.
81. Wallace DC. A mitochondrial paradigm of metabolic and degenerative diseases, aging, and cancer: a dawn for evolutionary medicine. *Annu Rev Genet* 2005;**39**:359–407.
82. Quinsay MN, Lee Y, Rikka S, Sayen MR, Molkentin JD, Gottlieb RA et al. Bnip3 mediates permeabilization of mitochondria and release of cytochrome c via a novel mechanism. *J Mol Cell Cardiol* 2009;**48**:1146–1156.
83. Hayflick L. The limited in vitro lifetime of human diploid cell strains. *Exp Cell Res* 1965;**37**:614–636.
84. Zwierschke W, Mazurek S, Stockl P, Hutter E, Eigenbrodt E, Jansen-Durr P. Metabolic analysis of senescent human fibroblasts reveals a role for AMP in cellular senescence. *Biochem J* 2003;**376**:403–411.
85. Hardie DG, Carling D. The AMP-activated protein kinase—fuel gauge of the mammalian cell? *Eur J Biochem* 1997;**246**:259–273.
86. Wang W, Yang X, Lopez de Silanes I, Carling D, Gorospe M. Increased AMP:ATP ratio and AMP-activated protein kinase activity during cellular senescence linked to reduced HuR function. *J Biol Chem* 2003;**278**:27016–27023.
87. Wang W, Fan J, Yang X, Furer-Galban S, Lopez de Silanes I, von Kobbe C et al. AMP-activated kinase regulates cytoplasmic HuR. *Mol Cell Biol* 2002;**22**:3425–3436.
88. Kukat A, Edgar D, Bratic I, Maiti P, Trifunovic A. Random mtDNA mutations modulate proliferation capacity in mouse embryonic fibroblasts. *Biochem Biophys Res Commun* 2011;**409**:394–399.
89. Lutgens E, de Muinck ED, Kitslaar PJ, Tordoir JH, Wellens HJ, Daemen MJ. Biphasic pattern of cell turnover characterizes the progression from fatty streaks to ruptured human atherosclerotic plaques. *Cardiovasc Res* 1999;**41**:473–479.
90. Clarke MC, Littlewood TD, Figg N, Maguire JJ, Davenport AP, Goddard M et al. Chronic apoptosis of vascular smooth muscle cells accelerates atherosclerosis and promotes calcification and medial degeneration. *Circ Res* 2008;**102**:1529–1538.
91. Ross R. Cell biology of atherosclerosis. *Annu Rev Physiol* 1995;**57**:791–804.
92. Chen J, Mehta JL, Haider N, Zhang X, Narula J, Li D. Role of caspases in Ox-LDL-induced apoptotic cascade in human coronary artery endothelial cells. *Circ Res* 2004;**94**:370–376.
93. Davidson SM, Duchon MR. Endothelial mitochondria: contributing to vascular function and disease. *Circ Res* 2007;**100**:1128–1141.
94. Ross R, Wight TN, Strandness E, Thiele B. Human atherosclerosis. I. Cell constitution and characteristics of advanced lesions of the superficial femoral artery. *Am J Pathol* 1984;**114**:79–93.
95. Bennett MR, Macdonald K, Chan SW, Boyle JJ, Weissberg PL. Cooperative interactions between RB and p53 regulate cell proliferation, cell senescence, and apoptosis in human vascular smooth muscle cells from atherosclerotic plaques. *Circ Res* 1998;**82**:704–712.
96. Matthews C, Gorenne I, Scott S, Figg N, Kirkpatrick P, Ritchie A et al. Vascular smooth muscle cells undergo telomere-based senescence in human atherosclerosis: effects of telomerase and oxidative stress. *Circ Res* 2006;**99**:156–164.
97. Crass MF 3rd, Borst SE, Scarpace PJ. Beta-adrenergic responsiveness in cultured aorta smooth muscle cells. Effects of subculture and aging. *Biochem Pharmacol* 1992;**43**:1811–1815.
98. Robert L, Robert AM, Jacotot B. Elastin-elastase-atherosclerosis revisited. *Atherosclerosis* 1998;**140**:281–295.
99. Gorenne I, Kavurma M, Scott S, Bennett M. Vascular smooth muscle cell senescence in atherosclerosis. *Cardiovasc Res* 2006;**72**:9–17.
100. Rosca MG, Hoppel CL. Mitochondria in heart failure. *Cardiovasc Res* 2010;**88**:40–50.
101. Halestrap AP. Calcium, mitochondria and reperfusion injury: a pore way to die. *Biochem Soc Trans* 2006;**34**:232–237.
102. Kearney PM, Whelton M, Reynolds K, Muntner P, Whelton PK, He J. Global burden of hypertension: analysis of worldwide data. *Lancet* 2005;**365**:217–223.
103. Zalba G, San Jose G, Moreno MU, Fortuno MA, Fortuno A, Beaumont FJ et al. Oxidative stress in arterial hypertension: role of NAD(P)H oxidase. *Hypertension* 2001;**38**:1395–1399.
104. Abadir PM, Foster DB, Crow M, Cooke CA, Rucker JJ, Jain A et al. Identification and characterization of a functional mitochondrial angiotensin system. *Proc Natl Acad Sci USA* 2011;**108**:14849–14854.
105. Cook JL, Re RN. Invited Review: Lessons from in vitro studies and a related intracellular angiotensin II transgenic mouse model. *Am J Physiol Regul Integr Comp Physiol* 2011;**302**:R482–R493.
106. Rodrigues SF, Granger DN. Cerebral microvascular inflammation in DOCA salt-induced hypertension: role of angiotensin II and mitochondrial superoxide. *J Cereb Blood Flow Metab* 2011;**32**:368–75.
107. Kubo SH, Rector TS, Bank AJ, Williams RE, Heifetz SM. Endothelium-dependent vasodilation is attenuated in patients with heart failure. *Circulation* 1991;**84**:1589–1596.
108. Drexler H, Hayoz D, Munzel T, Hornig B, Just H, Brunner HR et al. Endothelial function in chronic congestive heart failure. *Am J Cardiol* 1992;**69**:1596–1601.
109. Irwin MW, Mak S, Mann DL, Qu R, Penninger JM, Yan A et al. Tissue expression and immunolocalization of tumor necrosis factor- $\alpha$  in postinfarction dysfunctional myocardium. *Circulation* 1999;**99**:1492–1498.
110. Corda S, Laplace C, Vicaut E, Duranteau J. Rapid reactive oxygen species production by mitochondria in endothelial cells exposed to tumor necrosis factor- $\alpha$  is mediated by ceramide. *Am J Respir Cell Mol Biol* 2001;**24**:762–768.
111. Bauersachs J, Bouloumie A, Fraccarollo D, Hu K, Busse R, Ertl G. Endothelial dysfunction in chronic myocardial infarction despite increased vascular endothelial nitric oxide synthase and soluble guanylate cyclase expression: role of enhanced vascular superoxide production. *Circulation* 1999;**100**:292–298.
112. Braunwald E, Kloner RA. Myocardial reperfusion: a double-edged sword? *J Clin Invest* 1985;**76**:1713–1719.
113. Carden DL, Granger DN. Pathophysiology of ischaemia–reperfusion injury. *J Pathol* 2000;**190**:255–266.
114. Freude B, Masters TN, Robicsek F, Fokin A, Kostin S, Zimmermann R et al. Apoptosis is initiated by myocardial ischemia and executed during reperfusion. *J Mol Cell Cardiol* 2000;**32**:197–208.
115. Therade-Matharan S, Laemmel E, Duranteau J, Vicaut E. Reoxygenation after hypoxia and glucose depletion causes reactive oxygen species production by mitochondria in HUVEC. *Am J Physiol Regul Integr Comp Physiol* 2004;**287**:R1037–R1043.
116. Brown MS, Goldstein JL. Heart attacks: gone with the century? *Science* 1996;**272**:629.
117. Safarova MS, Trukhacheva EP, Ezhov MV, Afanas'eva OI, Afanas'eva MI, Tripoten MI et al. Pleiotropic effects of nicotinic acid therapy in men with coronary heart disease and elevated lipoprotein(a) levels. *Kardiologiia* 2011;**51**:9–16.
118. Mahmoudi M, Gorenne I, Mercer J, Figg N, Littlewood T, Bennett M. Statins use a novel Nijmegen breakage syndrome-1-dependent pathway to accelerate DNA repair in vascular smooth muscle cells. *Circ Res* 2008;**103**:717–725.
119. Boutbir J, Charles AL, Echaniz-Laguna A, Kindo M, Daussin F, Auwerx J et al. Opposite effects of statins on mitochondria of cardiac and skeletal muscles: a 'mitohormesis' mechanism involving reactive oxygen species and PGC-1. *Eur Heart J* 2011; doi:10.1093/eurheartj/ehr1224.
120. James AM, Cocheme HM, Smith RA, Murphy MP. Interactions of mitochondria-targeted and untargeted ubiquinones with the mitochondrial respiratory chain and reactive oxygen species. Implications for the use of exogenous ubiquinones as therapies and experimental tools. *J Biol Chem* 2005;**280**:21295–21312.

121. Graham D, Huynh NN, Hamilton CA, Beattie E, Smith RA, Cocheme HM et al. Mitochondria-targeted antioxidant MitoQ10 improves endothelial function and attenuates cardiac hypertrophy. *Hypertension* 2009;**54**:322–328.
122. Adlam VJ, Harrison JC, Porteous CM, James AM, Smith RA, Murphy MP et al. Targeting an antioxidant to mitochondria decreases cardiac ischemia–reperfusion injury. *FASEB J* 2005;**19**:1088–1095.
123. Mercer JR, Yu E, Figg N, Cheng KK, Prime TA, Griffin JL et al. The mitochondria-targeted antioxidant MitoQ decreases features of the metabolic syndrome in  $ATM^{+/-}/ApoE^{-/-}$  mice. *Free Radic Biol Med* 2011;**52**:841–849.
124. Taylor EB, Rutter J. Mitochondrial quality control by the ubiquitin–proteasome system. *Biochem Soc Trans* 2011;**39**:1509–1513.
125. Taylor RC, Dillin A. Aging as an event of proteostasis collapse. *Cold Spring Harb Perspect Biol* 2011;**3**; doi:10.1101/cshperspect.a004440.
126. Ben-Zvi A, Miller EA, Morimoto RI. Collapse of proteostasis represents an early molecular event in *Caenorhabditis elegans* aging. *Proc Natl Acad Sci USA* 2009;**106**:14914–14919.
127. Trifunovic A, Larsson NG. Mitochondrial dysfunction as a cause of ageing. *J Intern Med* 2008;**263**:167–178.
128. Safdar A, Bourgeois JM, Ogborn DI, Little JP, Hettinga BP, Akhtar M et al. Endurance exercise rescues progeroid aging and induces systemic mitochondrial rejuvenation in mtDNA mutator mice. *Proc Natl Acad Sci USA* 2011;**108**:4135–4140.
129. Conley KE, Jubrias SA, Amara CE, Marcinek DJ. Mitochondrial dysfunction: impact on exercise performance and cellular aging. *Exerc Sport Sci Rev* 2007;**35**:43–49.
130. Schiff M, Benit P, Coulibaly A, Loublier S, El-Khoury R, Rustin P. Mitochondrial response to controlled nutrition in health and disease. *Nutr Rev* 2011;**69**:65–75.
131. Cerqueira FM, Laurindo FR, Kowaltowski AJ. Mild mitochondrial uncoupling and calorie restriction increase fasting eNOS, akt and mitochondrial biogenesis. *PLoS One* 2011;**6**:e18433.
132. Shimazu T, Hirschey MD, Hua L, Dittenhafer-Reed KE, Schwer B, Lombard DB et al. SIRT3 deacetylates mitochondrial 3-hydroxy-3-methylglutaryl CoA synthase 2 and regulates ketone body production. *Cell Metab* 2010;**12**:654–661.
